# Supplementary material for: Exploring Spikelet Fertility and HSP70 Expression as Indicators of High Temperature Tolerance in Rice
Source: Research Square preprint supplement (doi:10.21203/rs.3.rs-6808278/v1), 2025-07-16
Supplement: Supplementary file 1 [file a8c3b66442045a432f2c7052.docx]

**Supporting Tables**

| **Table S1:** ANOVA table of stress damage indicators (EC, H2O2, MDA) compared with treatments. | | | | | | | |
| --- | --- | --- | --- | --- | --- | --- | --- |
|  | | | Sum of Squares | df | Mean Square | F | Sig. |
| EC * Treatment | Between Groups | (Combined) | 9384.119 | 6 | 1564.020 | 37.604 | .000 |
| Within Groups | | 3202.583 | 77 | 41.592 |  |  |
| Total | | 12586.702 | 83 |  |  |  |
| H2O2 * Treatment | Between Groups | (Combined) | 10386.605 | 6 | 1731.101 | 29.599 | .000 |
| Within Groups | | 4503.279 | 77 | 58.484 |  |  |
| Total | | 14889.884 | 83 |  |  |  |
| MDA * Treatment | Between Groups | (Combined) | 5.228 | 6 | .871 | 16.748 | .000 |
| Within Groups | | 4.006 | 77 | .052 |  |  |
| Total | | 9.235 | 83 |  |  |  |

| **Table S2:** ANOVA table of stress damage indicators (EC, H2O2, MDA) compared with growth stages. | | | | | | | |
| --- | --- | --- | --- | --- | --- | --- | --- |
|  | | | Sum of Squares | df | Mean Square | F | Sig. |
| EC * Growth | Between Groups | (Combined) | 9.024 | 2 | 4.512 | .029 | .971 |
| Within Groups | | 12577.679 | 81 | 155.280 |  |  |
| Total | | 12586.702 | 83 |  |  |  |
| H2O2 * Growth | Between Groups | (Combined) | 1769.875 | 2 | 884.937 | 5.463 | .006 |
| Within Groups | | 13120.009 | 81 | 161.975 |  |  |
| Total | | 14889.884 | 83 |  |  |  |
| MDA * Growth | Between Groups | (Combined) | 2.152 | 2 | 1.076 | 12.302 | .000 |
| Within Groups | | 7.083 | 81 | .087 |  |  |
| Total | | 9.235 | 83 |  |  |  |

| **Table S3:** ANOVA table of stress damage indicators (EC, H2O2, MDA) compared with rice variety. | | | | | | | |
| --- | --- | --- | --- | --- | --- | --- | --- |
|  | | | Sum of Squares | df | Mean Square | F | Sig. |
| EC * Rice | Between Groups | (Combined) | 1849.200 | 4 | 462.300 | 3.401 | .013 |
| Within Groups | | 10737.502 | 79 | 135.918 |  |  |
| Total | | 12586.702 | 83 |  |  |  |
| H2O2 * Rice | Between Groups | (Combined) | 1553.938 | 4 | 388.485 | 2.301 | .066 |
| Within Groups | | 13335.946 | 79 | 168.809 |  |  |
| Total | | 14889.884 | 83 |  |  |  |
| MDA * Rice | Between Groups | (Combined) | 1.208 | 4 | .302 | 2.972 | .024 |
| Within Groups | | 8.027 | 79 | .102 |  |  |
| Total | | 9.235 | 83 |  |  |  |
